# Supplementary material for: Genome-wide expression analysis of novel heat-responsive microRNAs and their targets in contrasting wheat genotypes at reproductive stage under terminal heat stress
Source: Frontiers journal article supplement (doi:10.3389/fpls.2024.1328114), 2024-04-10

Supplementary Figure S2. Network plot for the miRNAs and their targets associated with *taes00195* (Photosynthesis), *taes03040* (Spliceosome), *taes01250* (Biosynthesis of nucleotide sugars), and *taes04141* (Protein processing in endoplasmic reticulum) in flag leaf (**A**); *taes04141* (Protein processing in endoplasmic reticulum), *taes00330* (Arginine and proline metabolism), and *taes04144* (Endocytosis) in developing seeds (**B**).

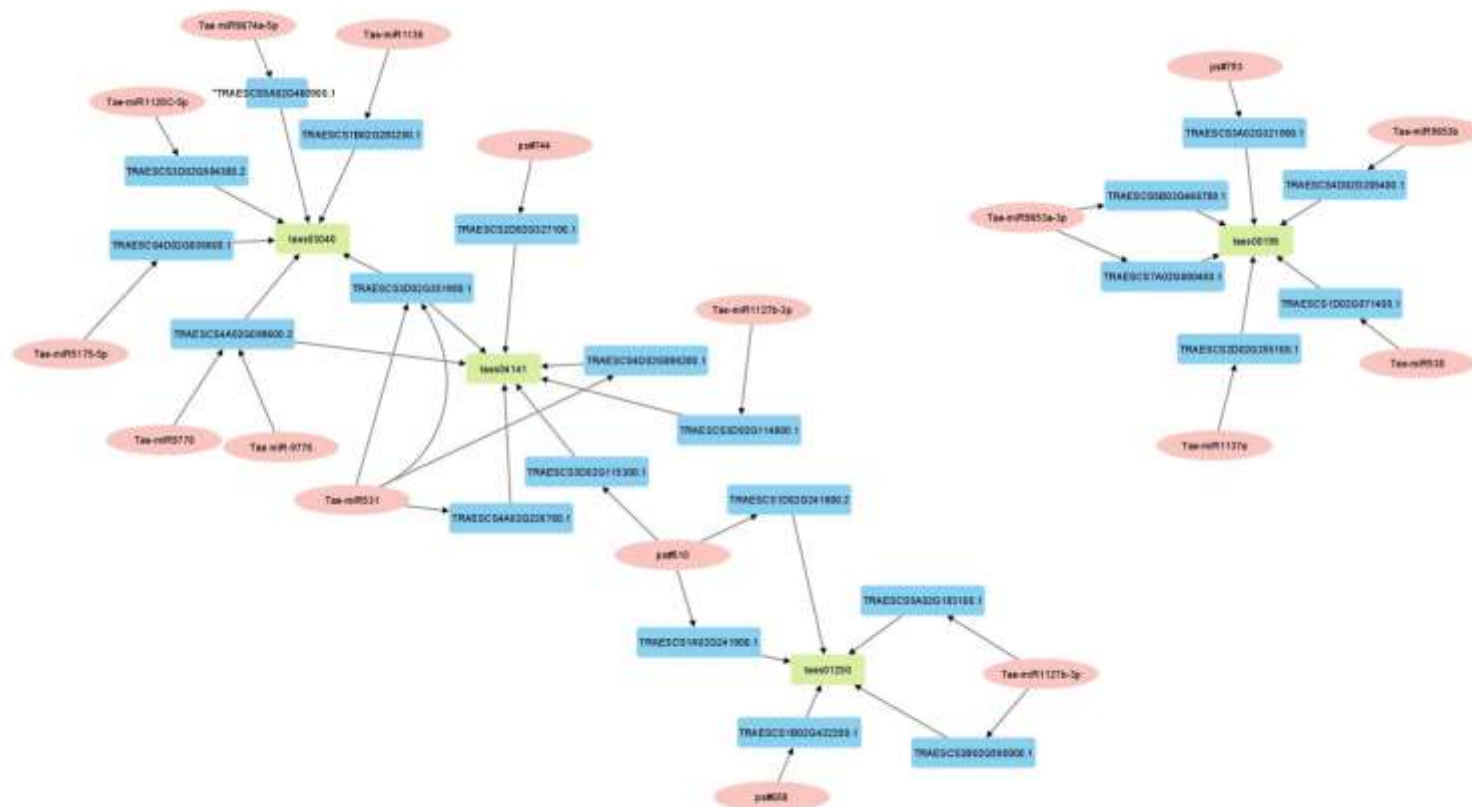

(B)

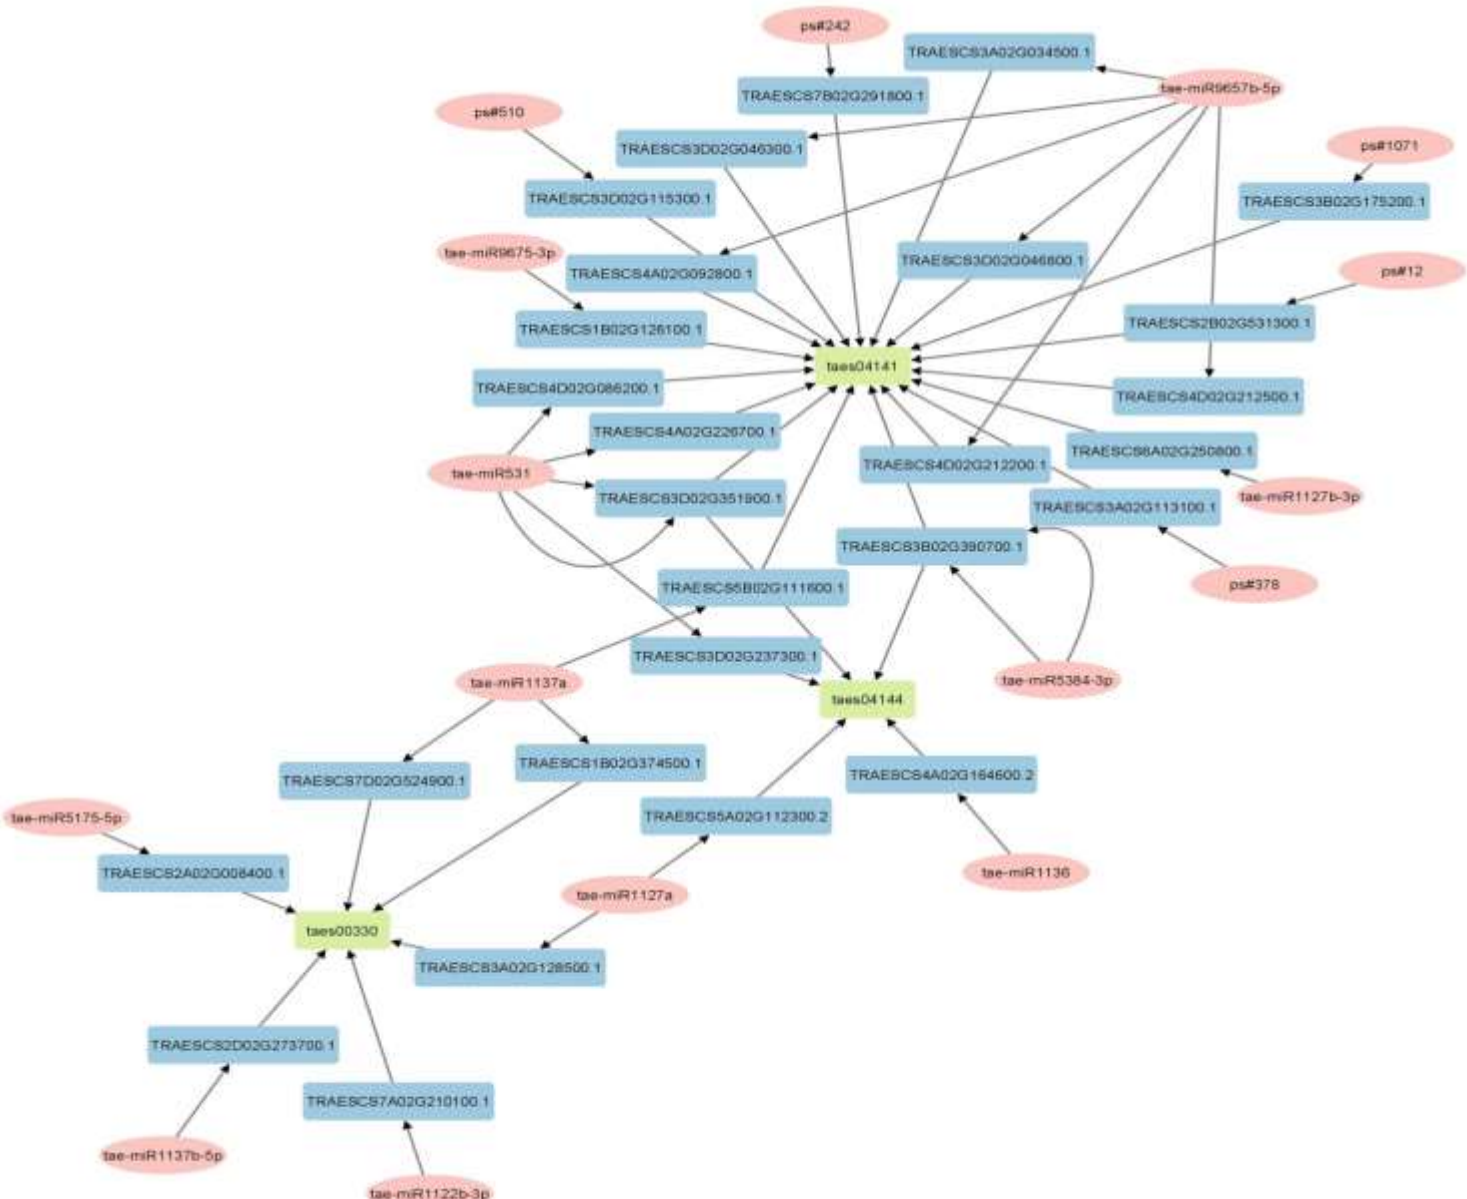

Supplement: Image_2.pdf [file Image_2.pdf]
